# Supplementary material for: Mucosal B Cells Are Associated with Delayed SIV Acquisition in Vaccinated Female but Not Male Rhesus Macaques Following SIVmac251 Rectal Challenge
Source: PubMed Central journal article supplement (PMC4534401; doi:10.1371/journal.ppat.1005101), 2015-08-12
Supplement: ppat.1005101.s001.pdf [file ppat.1005101.s001.pdf]

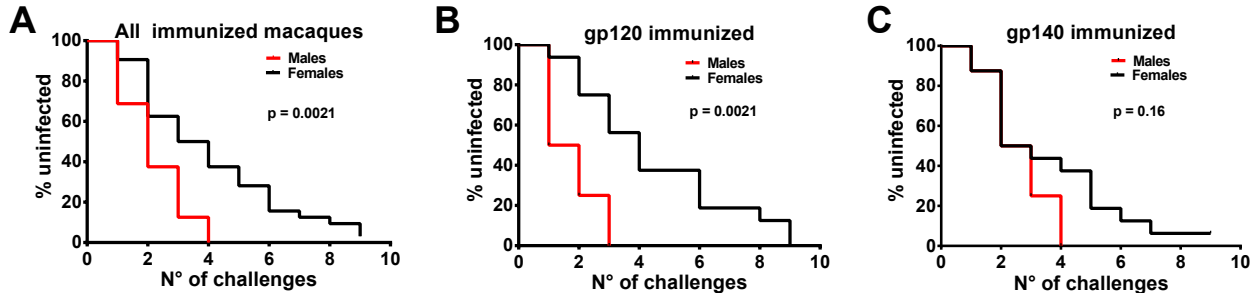

**S1 Fig. Comparison of rates of SIV acquisition in immunized male and female macaques.** (A) Delayed SIV acquisition in all immunized females compared to immunized males. (B) Delayed SIV acquisition in gp120-immunized females compared to gp120-immunized males but (C) not in gp140-immunized females compared to gp140-immunized males.
