# Supplementary material for: Mucosal B Cells Are Associated with Delayed SIV Acquisition in Vaccinated Female but Not Male Rhesus Macaques Following SIVmac251 Rectal Challenge
Source: PubMed Central journal article supplement (PMC4534401; doi:10.1371/journal.ppat.1005101), 2015-08-12
Supplement: ppat.1005101.s002.pdf [file ppat.1005101.s002.pdf]

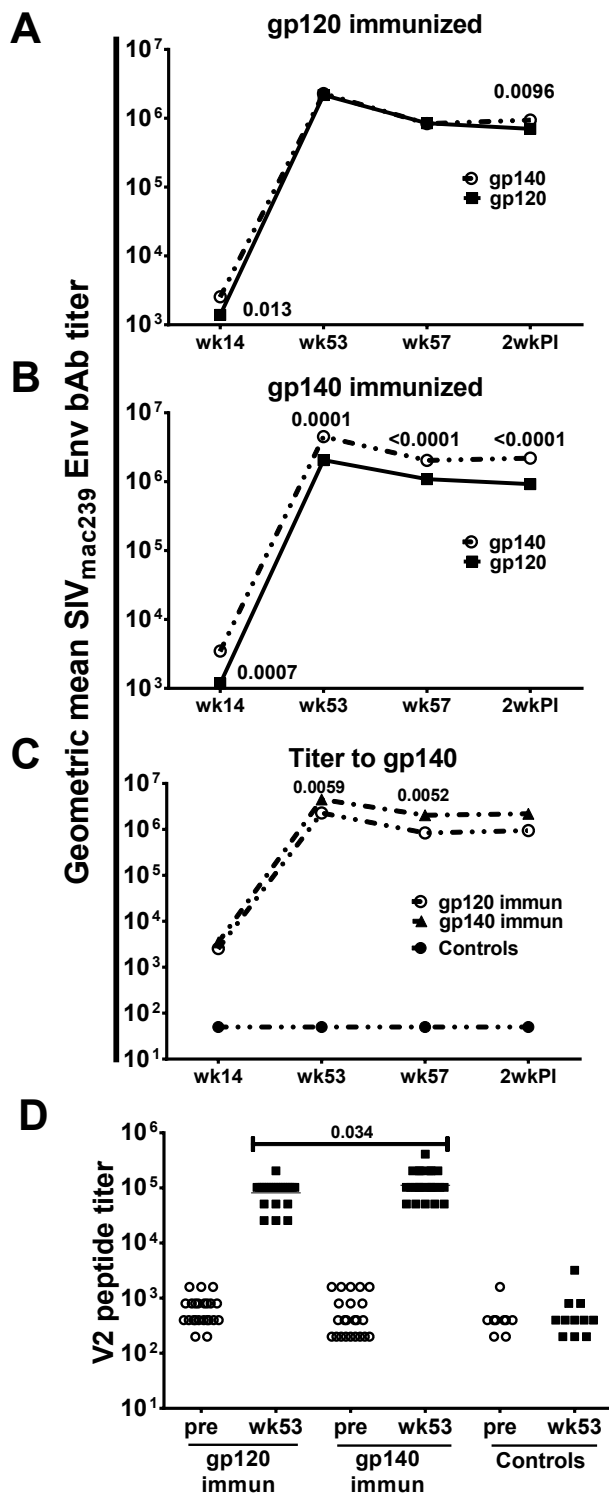

**S2 Fig. Serum Env-specific binding antibody responses in immunized macaques.** Binding antibody titers in gp120 - (A) and gp140 - immunized (B) macaques to SIV<sub>mac239</sub> monomeric gp120 and oligomeric gp140 and comparison of gp140 titers (C) between immunization groups and controls over the course of immunization and 2wkpi. Binding titers of pre -bleed samples were not obtained, but titers of control samples at all time points were <50. (D) Binding antibody titers to cyclic V2 peptide prior to immunization and at wk 53 by immunization group.
