# Supplementary material for: Mucosal B Cells Are Associated with Delayed SIV Acquisition in Vaccinated Female but Not Male Rhesus Macaques Following SIVmac251 Rectal Challenge
Source: PubMed Central journal article supplement (PMC4534401; doi:10.1371/journal.ppat.1005101), 2015-08-12
Supplement: ppat.1005101.s003.pdf [file ppat.1005101.s003.pdf]

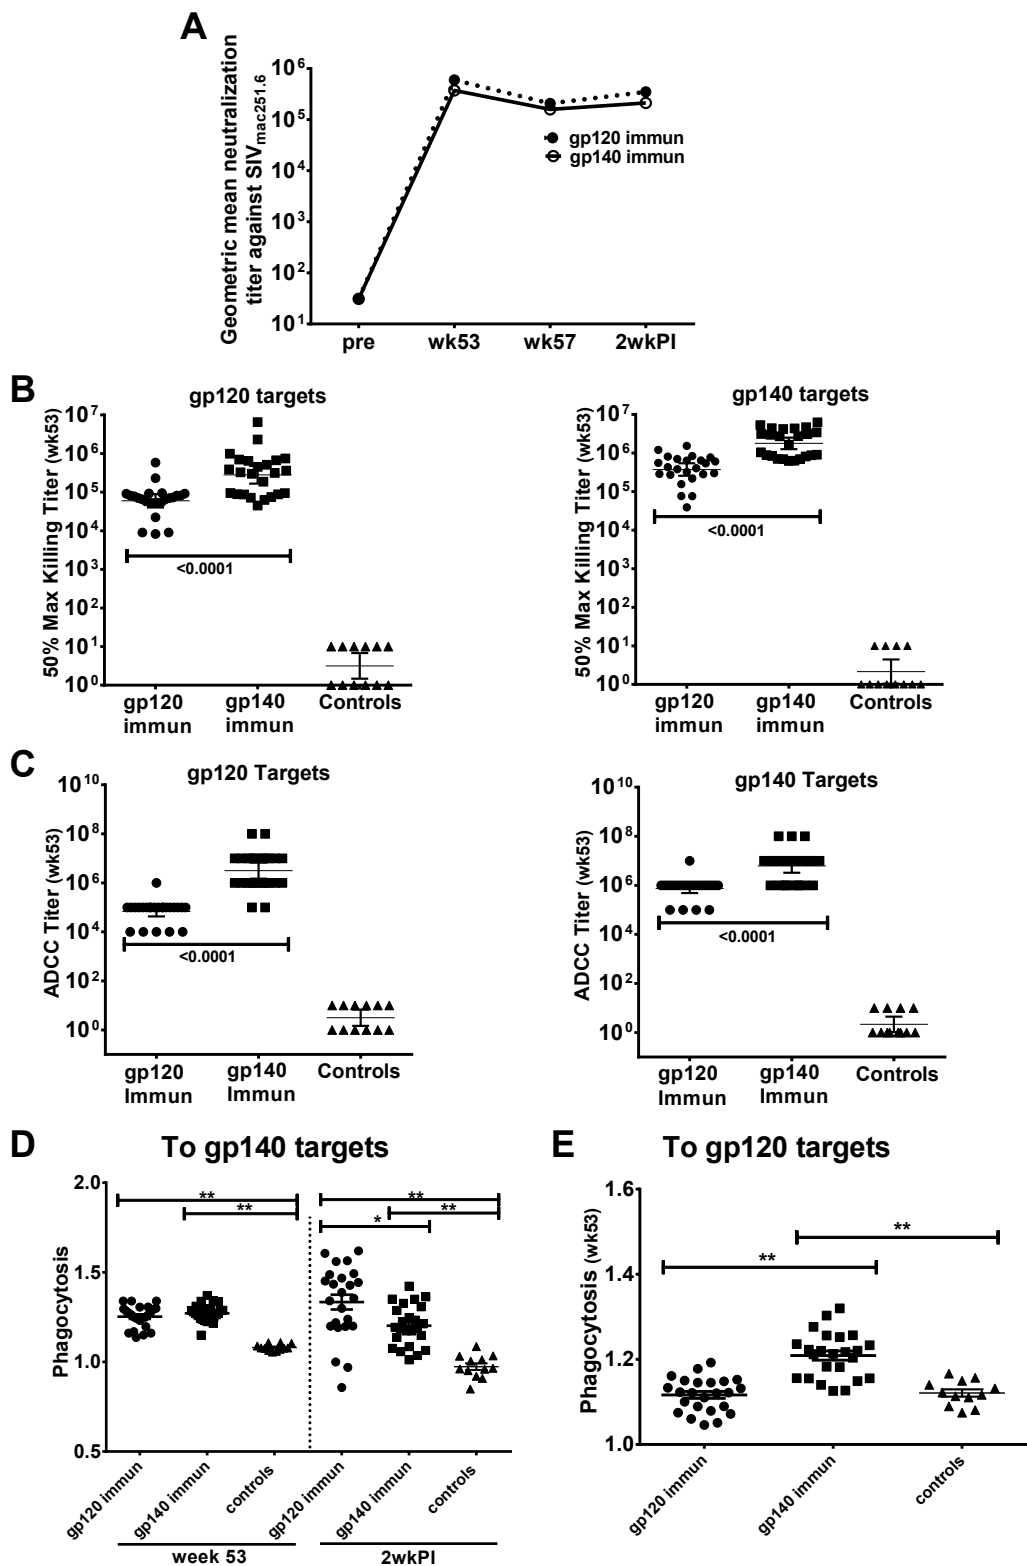

**S3 Fig. Serum neutralizing and non-neutralizing antibody activities.** (A) Neutralizing antibody titers over the course of immunization and 2wkpi by immunization group. ADCC to gp120 and gp140 targets expressed as 50% maximum killing titer (B) and endpoint titer (C) at wk 53. Mean phagocytosis score / background phagocytosis to gp140 targets at wk 53 and 2wkpi (D) and to gp120 targets at wk 53 (E) by immunization group. \*  $p = 0.0034$ , \*\*  $p < 0.0001$ . All titers expressed as geometric mean with 95% CL; phagocytosis expressed as mean  $\pm$  SEM.
