# Supplementary material for: Mucosal B Cells Are Associated with Delayed SIV Acquisition in Vaccinated Female but Not Male Rhesus Macaques Following SIVmac251 Rectal Challenge
Source: PubMed Central journal article supplement (PMC4534401; doi:10.1371/journal.ppat.1005101), 2015-08-12
Supplement: ppat.1005101.s006.pdf [file ppat.1005101.s006.pdf]

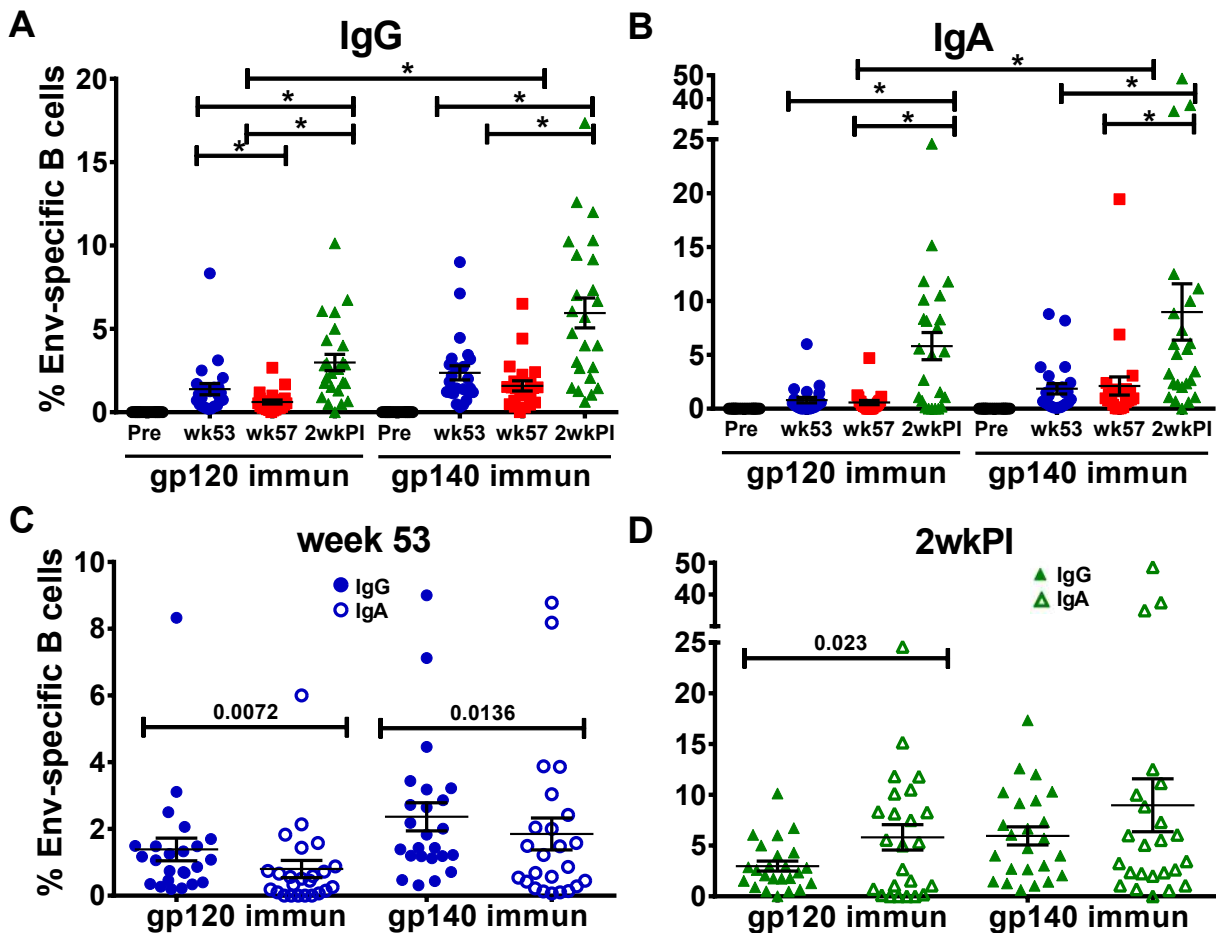

**S6 Fig. Bone marrow Env-specific antibody-secreting PB/PC assessed by ELISpot.** PB/PC secreting Env-specific IgG (A) and IgA (B) over the immunization course and 2wkpi. Comparison of Env-specific IgG and IgA PB/PC for both immunization groups at wk 53 (C) and 2wkpi (D). The gp120 group was tested against monomeric gp120 and the gp140 group against oligomeric gp140. \* $p < 0.01$ . Due to the large number of tests performed, only differences with  $p$  values  $< 0.01$  are shown in panels A and B. Mean values  $\pm$  SEM are shown.
