# Supplementary material for: Mucosal B Cells Are Associated with Delayed SIV Acquisition in Vaccinated Female but Not Male Rhesus Macaques Following SIVmac251 Rectal Challenge
Source: PubMed Central journal article supplement (PMC4534401; doi:10.1371/journal.ppat.1005101), 2015-08-12
Supplement: ppat.1005101.s007.pdf [file ppat.1005101.s007.pdf]

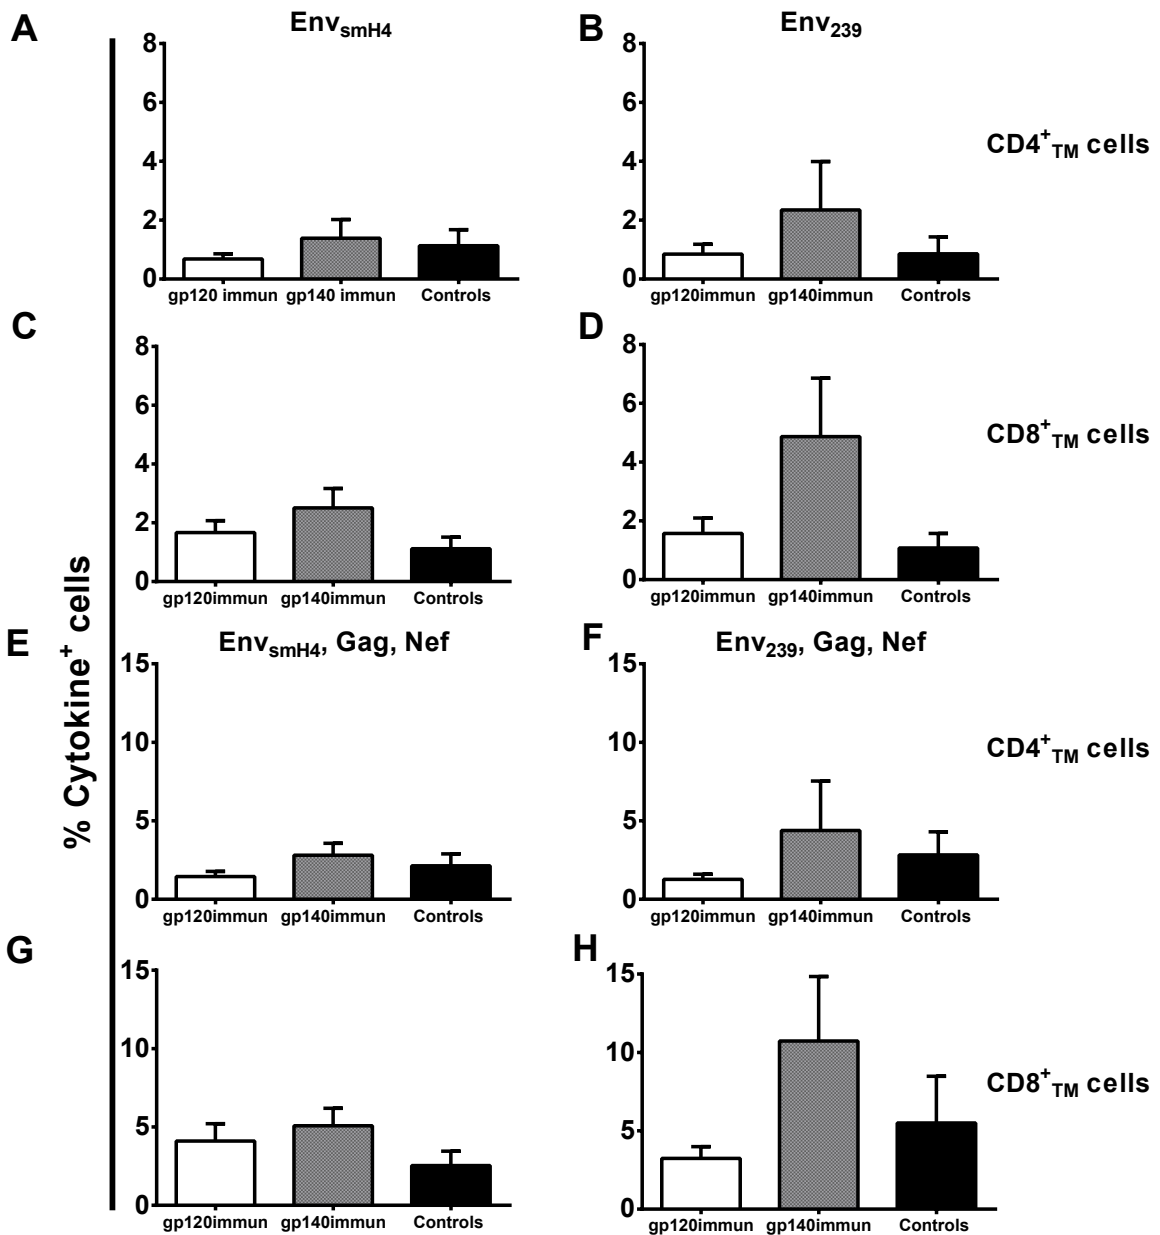

**S7 Fig. Vaccine-induced SIV-specific cellular immune responses by immunization group.** PBMC obtained 2wkpi from all macaque groups were assessed by intracellular cytokine staining for *Env<sub>smH4</sub>*<sup>-</sup> (A and C) and *Env<sub>239</sub>*<sup>-</sup> (B and D) specific CD4<sup>+</sup> (A,B) and CD8<sup>+</sup> (C, D) T cells. The frequency of CD4<sup>+</sup> (E and F) and CD8<sup>+</sup> (G and H) T cells specific for immunizing antigens in the Ad - recombinants (*Env<sub>smH4</sub>*, *Gag<sub>239</sub>* and *Nef<sub>239</sub>*) or protein boosts (*Env<sub>239</sub>*) were summed and presented. CD4<sup>+</sup> and CD8<sup>+</sup> central and effector memory cells were summed and results for total memory (TM) CD4<sup>+</sup> or CD8<sup>+</sup> T cells are presented as the percent cytokine positive cells expressing IFN- $\gamma$ , TNF- $\alpha$  and/or IL-2. Due to the large number of macaques, half the macaques in each group were assessed for either SIV<sub>smH4</sub> or SIV<sub>mac239</sub> Env - specificity and half were assessed for either SIV<sub>mac239</sub> Gag or SIV<sub>mac251</sub> Nef specificity. Mean values + SEM are shown.
