# Supplementary material for: Mucosal B Cells Are Associated with Delayed SIV Acquisition in Vaccinated Female but Not Male Rhesus Macaques Following SIVmac251 Rectal Challenge
Source: PubMed Central journal article supplement (PMC4534401; doi:10.1371/journal.ppat.1005101), 2015-08-12
Supplement: ppat.1005101.s008.pdf [file ppat.1005101.s008.pdf]

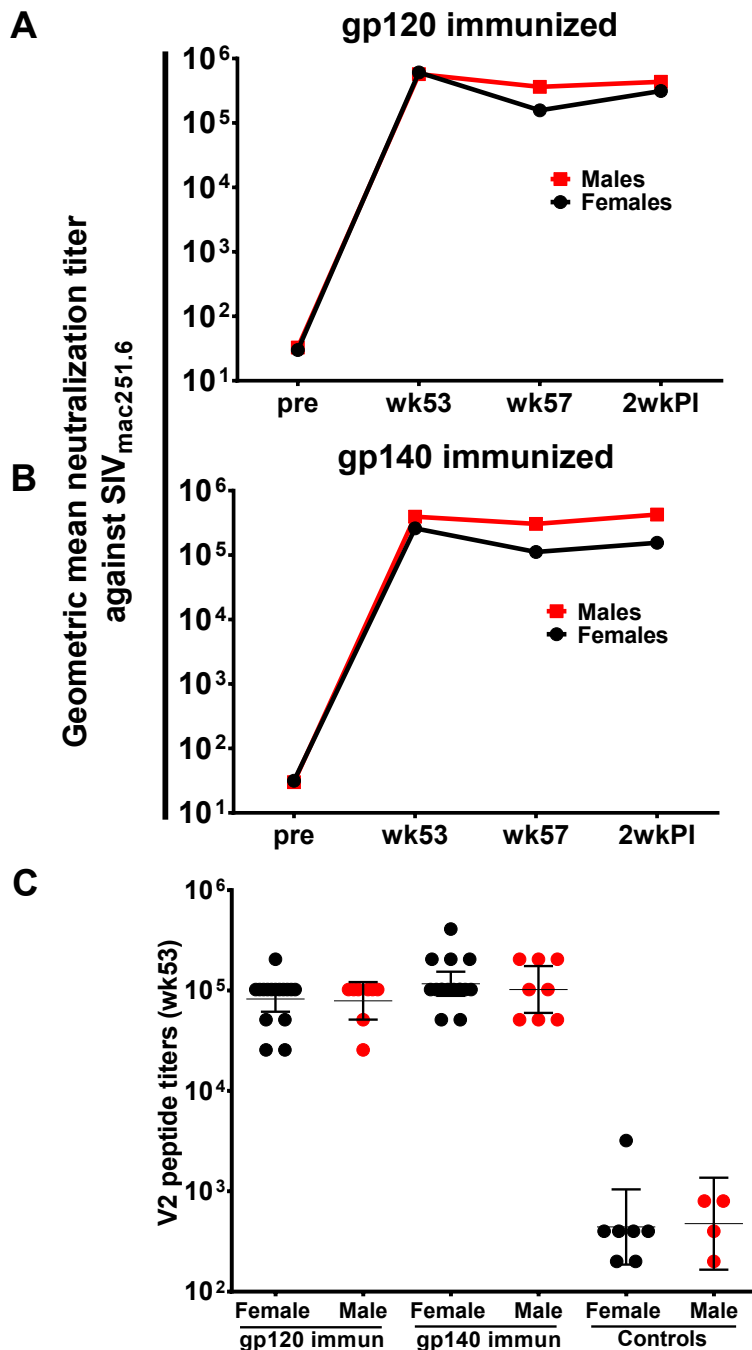

**S8 Fig. Systemic neutralizing and cyclic V2 binding antibody titers by sex.** Neutralizing antibody titers in (A) gp120 - and (B) gp140 - immunized females and males. (C) Serum cyclic V2 binding antibody titers in females and males of all macaque groups at 2 weeks post 2<sup>nd</sup> boost (wk 53). Bars denote geometric means with 95% CL.
