# Supplementary material for: Mucosal B Cells Are Associated with Delayed SIV Acquisition in Vaccinated Female but Not Male Rhesus Macaques Following SIVmac251 Rectal Challenge
Source: PubMed Central journal article supplement (PMC4534401; doi:10.1371/journal.ppat.1005101), 2015-08-12
Supplement: ppat.1005101.s011.pdf [file ppat.1005101.s011.pdf]

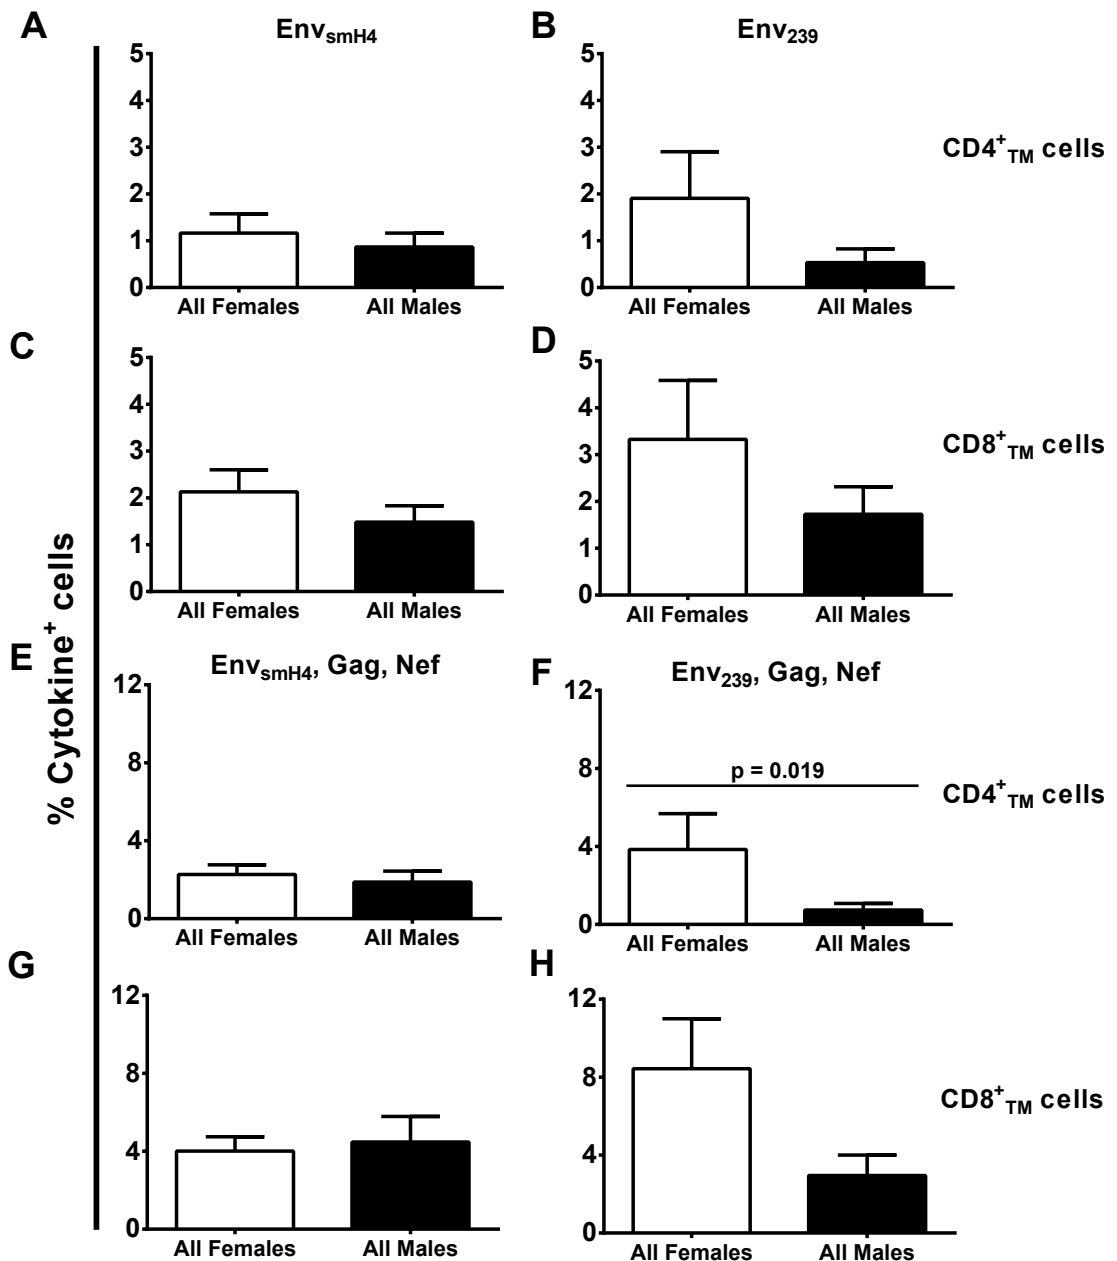

**S11 Fig. SIV-specific cellular immune responses in females and males.** PBMC obtained 2wkpi from all macaque groups were assessed by intracellular cytokine staining for Env<sub>smH4</sub>- (A,C) and Env<sub>239</sub>- (B,D) specific CD4<sup>+</sup> (A,B) and CD8<sup>+</sup> (C,D) T cells. Results for all females and all males are shown. Additionally, the frequency of CD4<sup>+</sup> (E,F) and CD8<sup>+</sup> (G,H) T cells specific for immunizing antigens in the Ad-recombinants (Env<sub>smH4</sub>, Gag<sub>239</sub> and Nef<sub>239</sub>) or protein boosts (Env<sub>239</sub>) were summed and presented for all females and all males. CD4<sup>+</sup> and CD8<sup>+</sup> central and effector memory cells were summed and results for total memory (TM) CD4<sup>+</sup> or CD8<sup>+</sup> T cells are presented as the percent cytokine positive cells expressing IFN- $\gamma$ , TNF- $\alpha$  and/or IL-2. Due to the large number of macaques, half the macaques in each group were assessed for either SIV<sub>smH4</sub> or SIV<sub>mac239</sub> Env-specificity and half were assessed for either SIV<sub>mac239</sub> Gag or SIV<sub>mac251</sub> Nef specificity. Mean values + SEM are shown.
