# Supplementary material for: Mucosal B Cells Are Associated with Delayed SIV Acquisition in Vaccinated Female but Not Male Rhesus Macaques Following SIVmac251 Rectal Challenge
Source: PubMed Central journal article supplement (PMC4534401; doi:10.1371/journal.ppat.1005101), 2015-08-12
Supplement: ppat.1005101.s013.pdf [file ppat.1005101.s013.pdf]

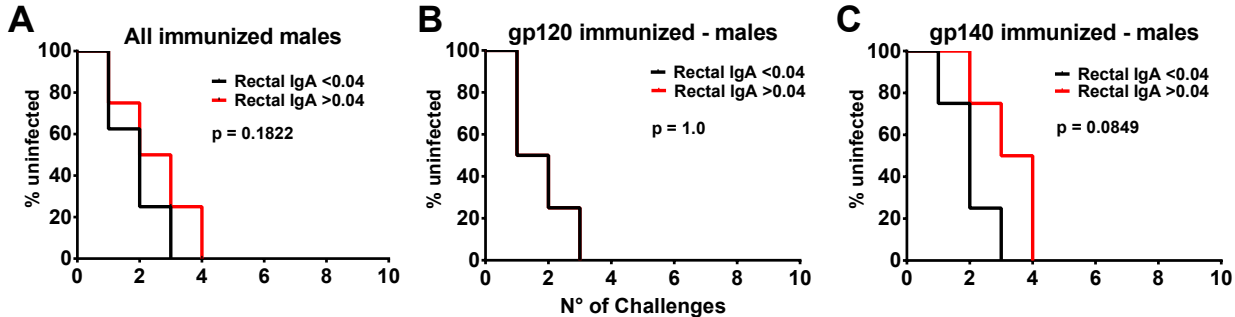

**S13 Fig. Rectal Env - specific IgA not correlated with delayed SIV acquisition in immunized males.** No influence of rectal Env-specific IgA at wk 55 on the rate of infection in (A) all immunized males, (B) gp120-immunized males, and (C) gp140- immunized males.
