# Supplementary material for: Mucosal B Cells Are Associated with Delayed SIV Acquisition in Vaccinated Female but Not Male Rhesus Macaques Following SIVmac251 Rectal Challenge
Source: PubMed Central journal article supplement (PMC4534401; doi:10.1371/journal.ppat.1005101), 2015-08-12
Supplement: ppat.1005101.s014.pdf [file ppat.1005101.s014.pdf]

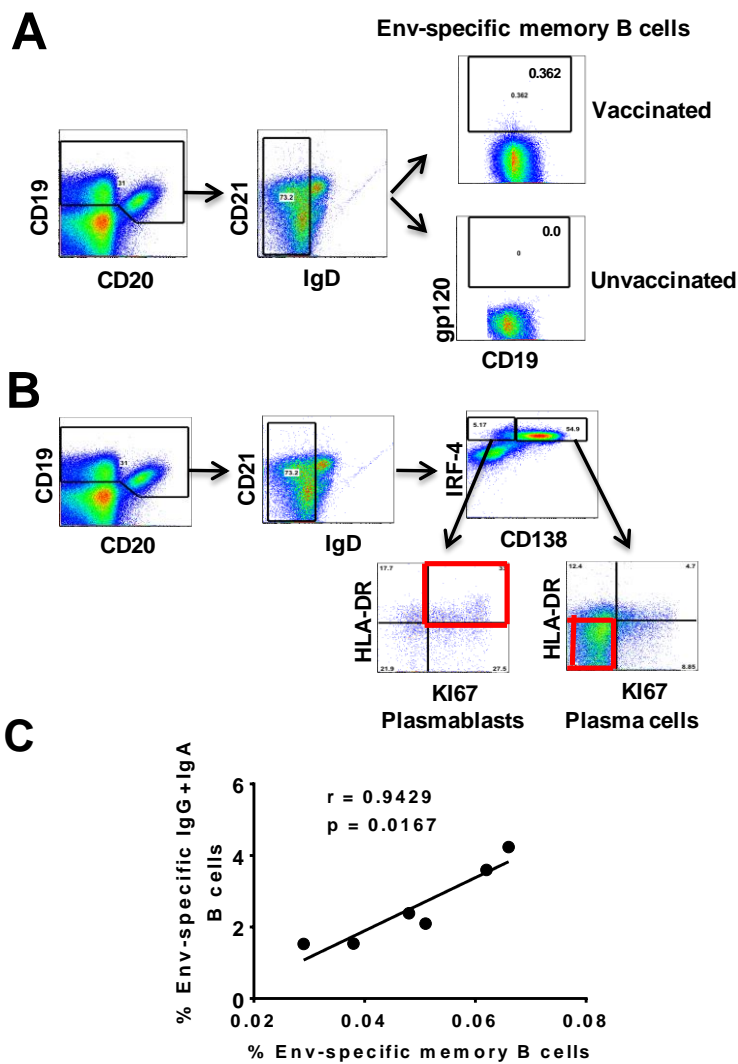

**S14 Fig. Gating strategy for Env-specific memory B cells, plasmablasts and plasma cells in rectal tissue.** (A) Example of flow cytometry staining for Env-specific memory B cells: Live CD2<sup>-</sup>CD14<sup>-</sup> cells from rectal pinches were gated for CD19<sup>+</sup>CD20<sup>+</sup> B cells and then IgD<sup>+</sup> B cells were excluded. The far right-hand plot shows Env-specific memory B cells in a vaccinated macaque and a control macaque using biotinylated gp120. (B) Example of flow cytometry staining for PB and PC. Live CD2<sup>-</sup>CD14<sup>-</sup> cells from rectal pinches were gated for CD19<sup>+</sup>CD20<sup>+</sup> B cells and then IgD<sup>+</sup> B cells were excluded. IgD<sup>-</sup> B cells were further gated for IRF4<sup>+</sup>CD138<sup>-</sup> and IRF4<sup>+</sup>CD138<sup>+</sup>. PB (upper-right quadrant highlighted by the red box) are identified as CD19<sup>+</sup>CD20<sup>+</sup>/IgD<sup>-</sup>IRF4<sup>+</sup>CD138<sup>-</sup>HLA-DR<sup>+</sup>Ki67<sup>+</sup>. PC (lower-left quadrant highlighted by the red box) are identified as CD19<sup>+</sup>CD20<sup>+</sup>/IgD<sup>-</sup>IRF4<sup>+</sup>CD138<sup>+</sup>HLA-DR<sup>+</sup>Ki67<sup>-</sup>. (C) gp120-specific memory B cells quantified by flow cytometry correlate with frequency of Env-specific memory B cells secreting IgG + IgA by ELISpot in rectal biopsies from chronically SIV infected macaques.
