# Supplementary material for: Mucosal B Cells Are Associated with Delayed SIV Acquisition in Vaccinated Female but Not Male Rhesus Macaques Following SIVmac251 Rectal Challenge
Source: PubMed Central journal article supplement (PMC4534401; doi:10.1371/journal.ppat.1005101), 2015-08-12
Supplement: ppat.1005101.s015.pdf [file ppat.1005101.s015.pdf]

**A**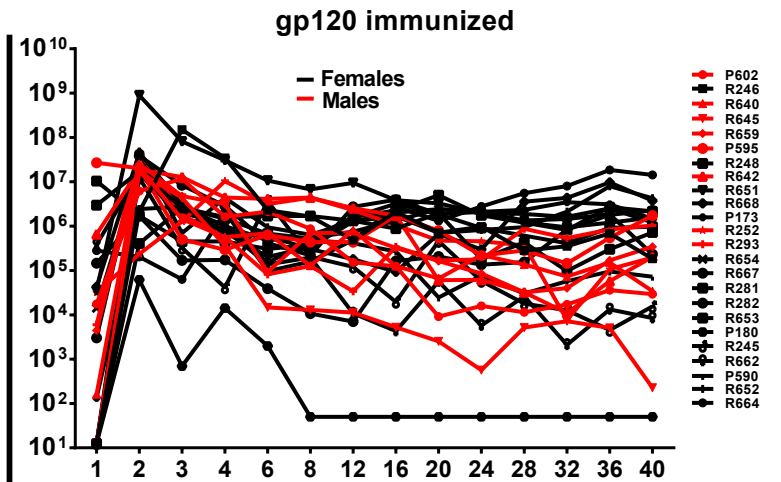**B**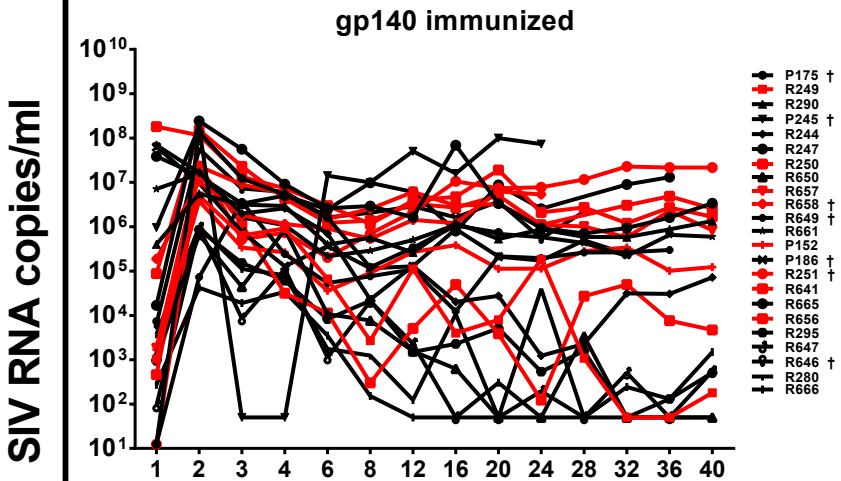**C**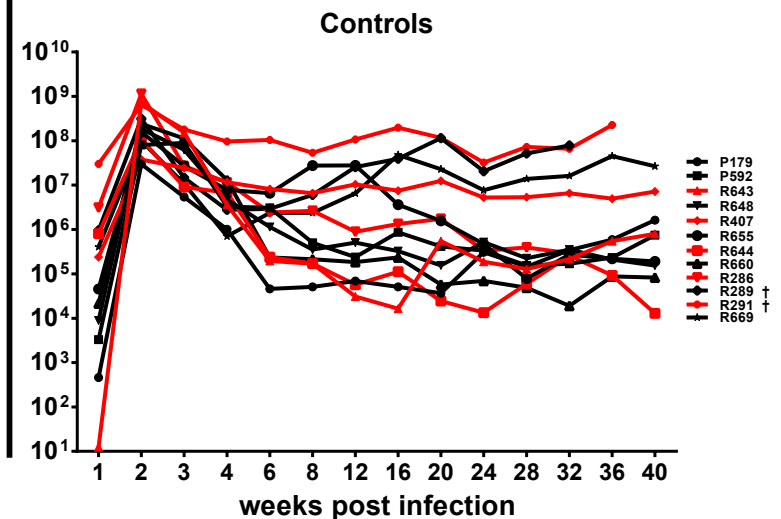

**S15 Fig. Individual plasma viral loads for gp120 and gp140 immunized and control macaques.** (A -C) Viral loads were recorded up to 40 wkpi. Female macaques are shown in black lines and males in red lines. A † marks macaques that were euthanized before 40 weeks of follow up. Macaque R663 in the gp140 - immunized group resisted infection over 9 challenges, and is not shown.
