# Supplementary material for: Mucosal B Cells Are Associated with Delayed SIV Acquisition in Vaccinated Female but Not Male Rhesus Macaques Following SIVmac251 Rectal Challenge
Source: PubMed Central journal article supplement (PMC4534401; doi:10.1371/journal.ppat.1005101), 2015-08-12
Supplement: ppat.1005101.s016.pdf [file ppat.1005101.s016.pdf]

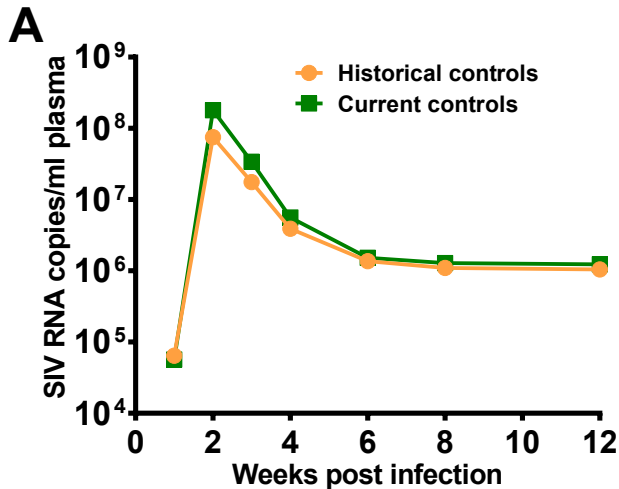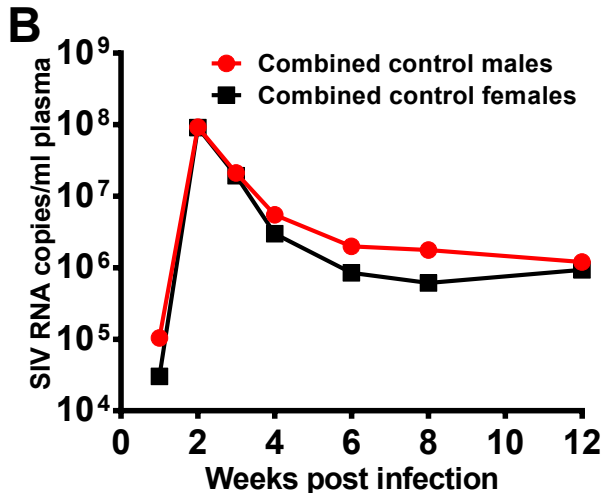

**S16 Fig. Dynamics of plasma viral loads in SIV-infected historical and current control macaques.** Plasma viral loads (geometric mean) in historical and current controls (A) and in (B) combined control males and females.
