# Supplementary material for: Mucosal B Cells Are Associated with Delayed SIV Acquisition in Vaccinated Female but Not Male Rhesus Macaques Following SIVmac251 Rectal Challenge
Source: PubMed Central journal article supplement (PMC4534401; doi:10.1371/journal.ppat.1005101), 2015-08-12
Supplement: ppat.1005101.s017.pdf [file ppat.1005101.s017.pdf]

## gp120 immunized

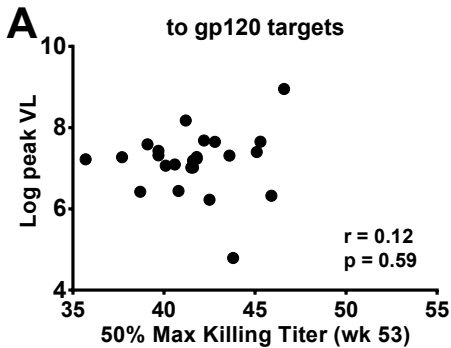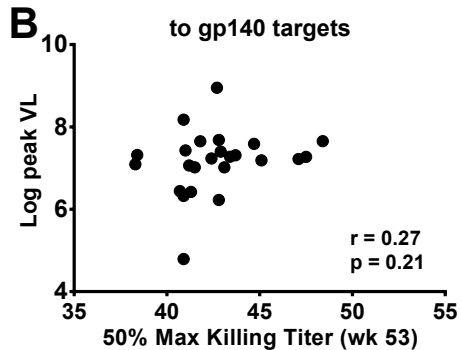

## gp140 immunized

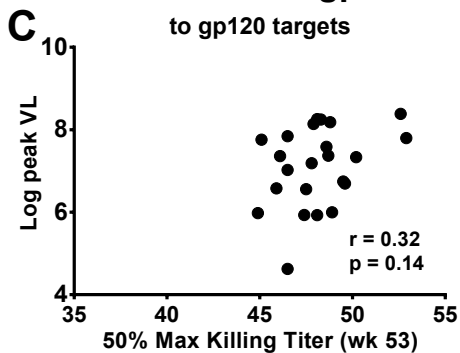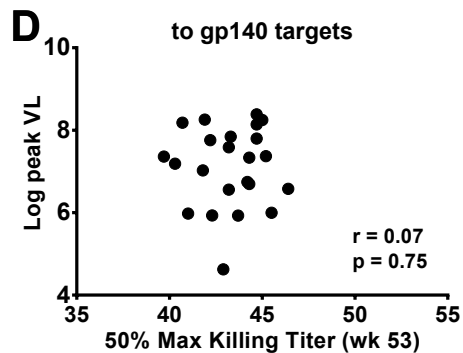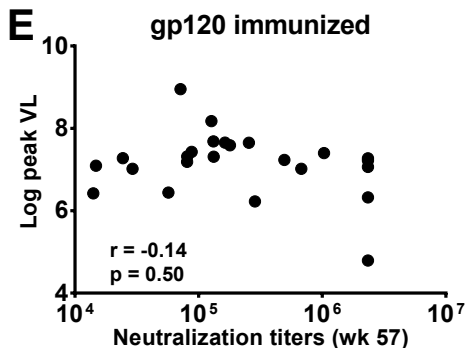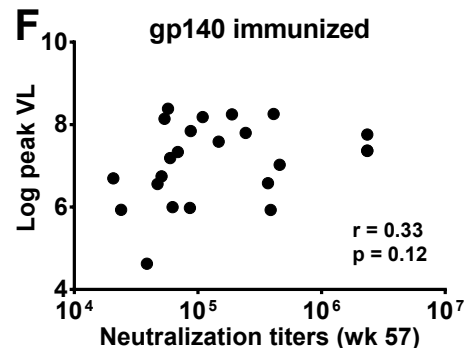

**S17 Fig. No correlation of serum neutralizing and ADCC antibody activities with viremia control.** Lack of correlation of serum (wk 53) ADCC against gp120 and gp140 targets expressed as 50% maximum killing titer from (A and B) gp120- and (C and D) gp140- immunized animals with peak viral load. No correlation of neutralizing antibody titers (wk 57) from (E) gp120- and (F) gp140- immunized animals with peak viral load.
