# Supplementary material for: Mucosal B Cells Are Associated with Delayed SIV Acquisition in Vaccinated Female but Not Male Rhesus Macaques Following SIVmac251 Rectal Challenge
Source: PubMed Central journal article supplement (PMC4534401; doi:10.1371/journal.ppat.1005101), 2015-08-12
Supplement: ppat.1005101.s018.pdf [file ppat.1005101.s018.pdf]

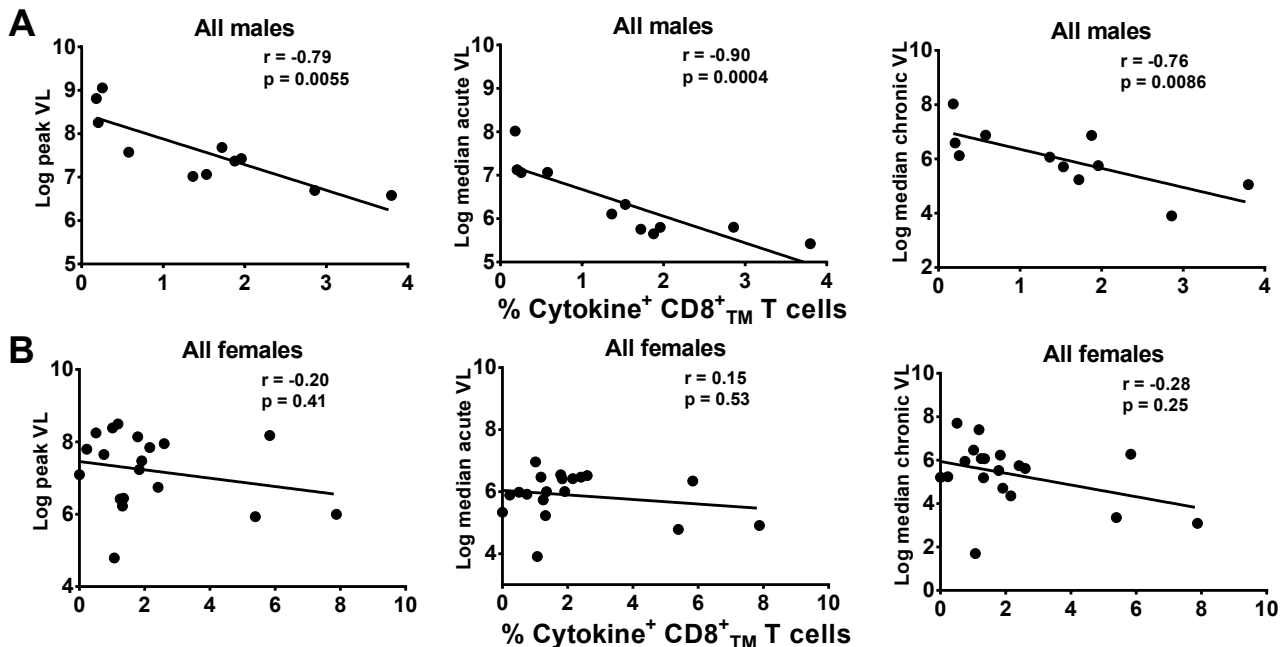

**S18 Fig. SIV Env-specific CD8<sup>+</sup> T cell responses correlate with control of viremia in all males, but not in females.** PBMC obtained 2wkpi from all macaque groups were assessed by intracellular cytokine staining for Env<sub>smH4</sub>-specific CD8<sup>+</sup> T cells. Significant correlations were observed in all males with control of viremia (A) including reduced peak, median acute (weeks 1- 6) and median chronic (over wk 8 – 24) viral loads. Similar correlations were not seen for all female macaques (B). CD8<sup>+</sup> central and effector memory cells were summed and results for total memory (TM) CD8<sup>+</sup> T cells are presented as the percent cytokine positive cells expressing IFN- $\gamma$ , TNF- $\alpha$  and / or IL-2. Due to the large number of macaques, only half the macaques in each group were assessed for SIV<sub>smH4</sub> Env-specificity.
