# Supplementary material for: Mucosal B Cells Are Associated with Delayed SIV Acquisition in Vaccinated Female but Not Male Rhesus Macaques Following SIVmac251 Rectal Challenge
Source: PubMed Central journal article supplement (PMC4534401; doi:10.1371/journal.ppat.1005101), 2015-08-12
Supplement: ppat.1005101.s019.pdf [file ppat.1005101.s019.pdf]

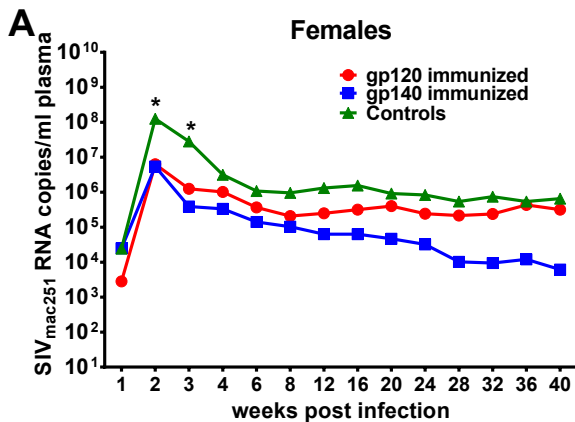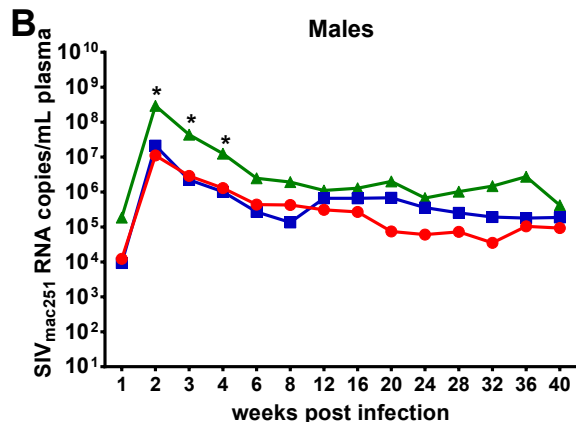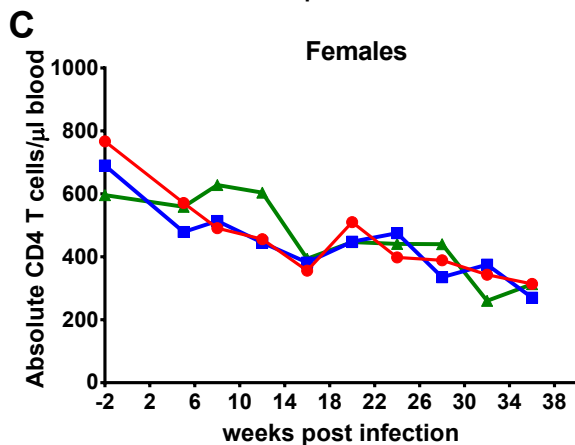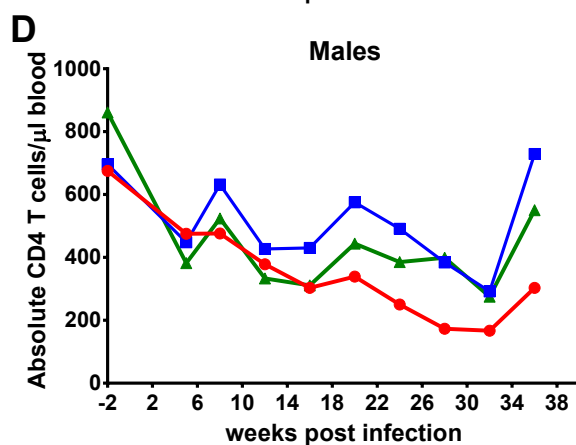

**S19 Fig. Dynamics of plasma viral loads and CD4 counts in SIV - infected female and male rhesus macaques by immunization group.** Plasma viral loads (geometric mean) in females (A) and males (B) by immunization group. Absolute CD4<sup>+</sup> T cell counts (mean values) in (C) females and (D) males by immunization group. \* $p < 0.05$  for immunized males vs controls;  $p < 0.01$  for immunized females vs controls.
